# Supplementary material for: Ror homolog nhr-23 is essential for both developmental clock and circadian clock in C. elegans
Source: PubMed Central journal article supplement (PMC10902330; doi:10.1038/s42003-024-05894-3), 2024-02-28

## Supplemental Information

### Fig.S1.

#### Comparison between BioCycle and JTK\_CYCLE.

The amplitude of the cosine fit was calculated, and filtered by amplitude  $> 1$  to cut off the artifacts. Then we compared genes with a threshold of  $q < 0.1$  or  $q < 0.2$  in each of the algorithms. For details, see Supplemental Data 1.

### Fig. S2

#### Putative artifacts in the dataset.

(A) (left) Histogram of estimated amplitudes in all genes and (right) zoomed graph around amplitude = 0.00. An abnormally high peak is observed around amplitude = 0.0472. (B) (left) Histogram of estimated amplitudes in all genes and (right) zoomed graph around  $p = 0.02$ . An abnormally high peak is observed around amplitude = 0.0197. (C) Example plot of gene expression included in the abnormal peaks. Genes show identical expression patterns. The complete list of putative artifacts is described in **Supplemental Data 4**.

### Fig. S3

#### ChIP peaks around the cluster ii genes.

ChIP results acquired from [www.wormbase.org](http://www.wormbase.org), which is based on Araya et al., 2014.

### Fig.S4

#### Alignment of ROR/NHR-23 homologous proteins.

(a) The full-length amino acid sequences of ROR/NHR-23 homologous proteins were aligned using ClustalW. The following proteins were used as the homologs in each species: NHR-23: *Caenorhabditis elegans*, dHR3: *Drosophila melanogaster*, RORAA: *Danio rerio*, RORG: *Mus Musculus*. (b) Number of mice (*Mus Musculus*) homologs with circadian rhythms. Rhythmic mice genes were extracted from Rhythmic DB (with  $q < 0.05$ ). The definition of homologs is based on "homology" information in WormBase.

**Fig. S5**

**RNA-seq results with the raw TPM value.**

Plot with the TPM value before normalization. Genes and color codes were same as those in Fig.3D, E, G.

Fig. S1

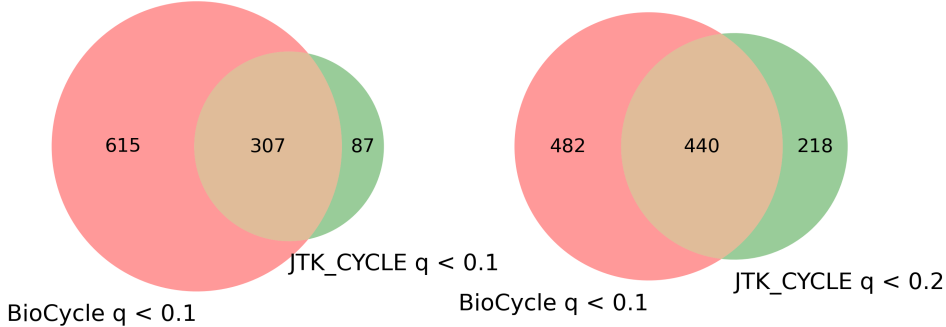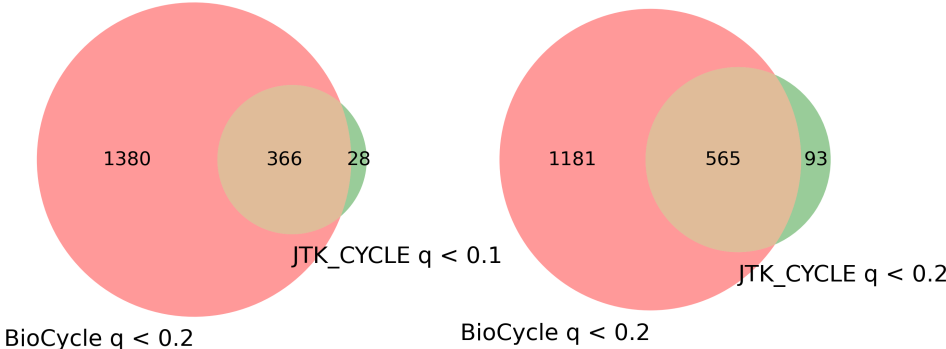

Fig. S2

a

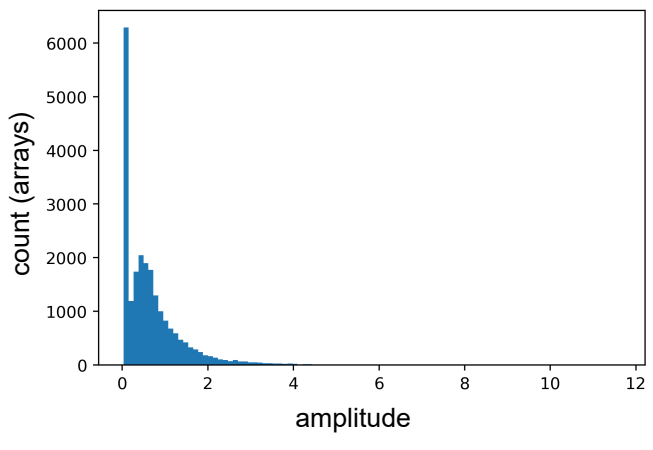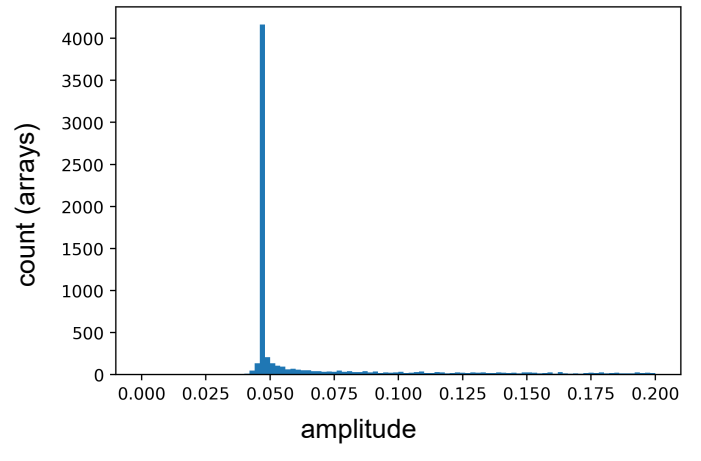

b

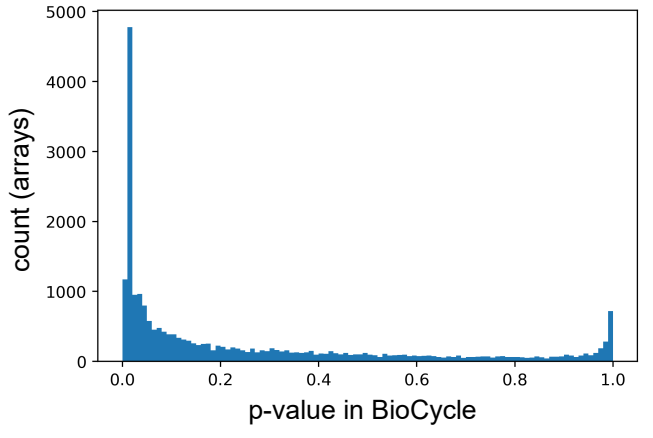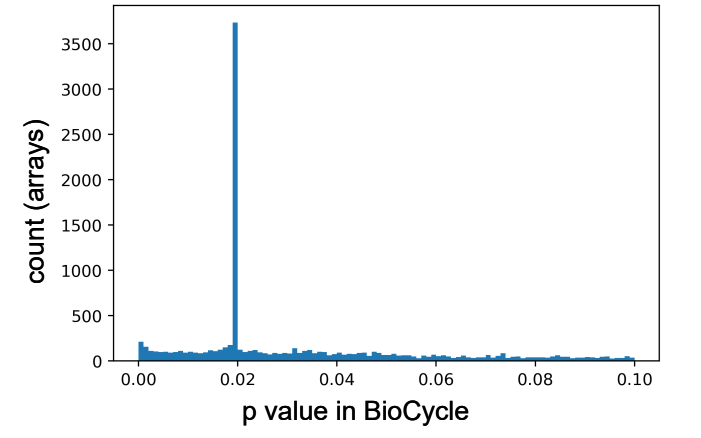

c

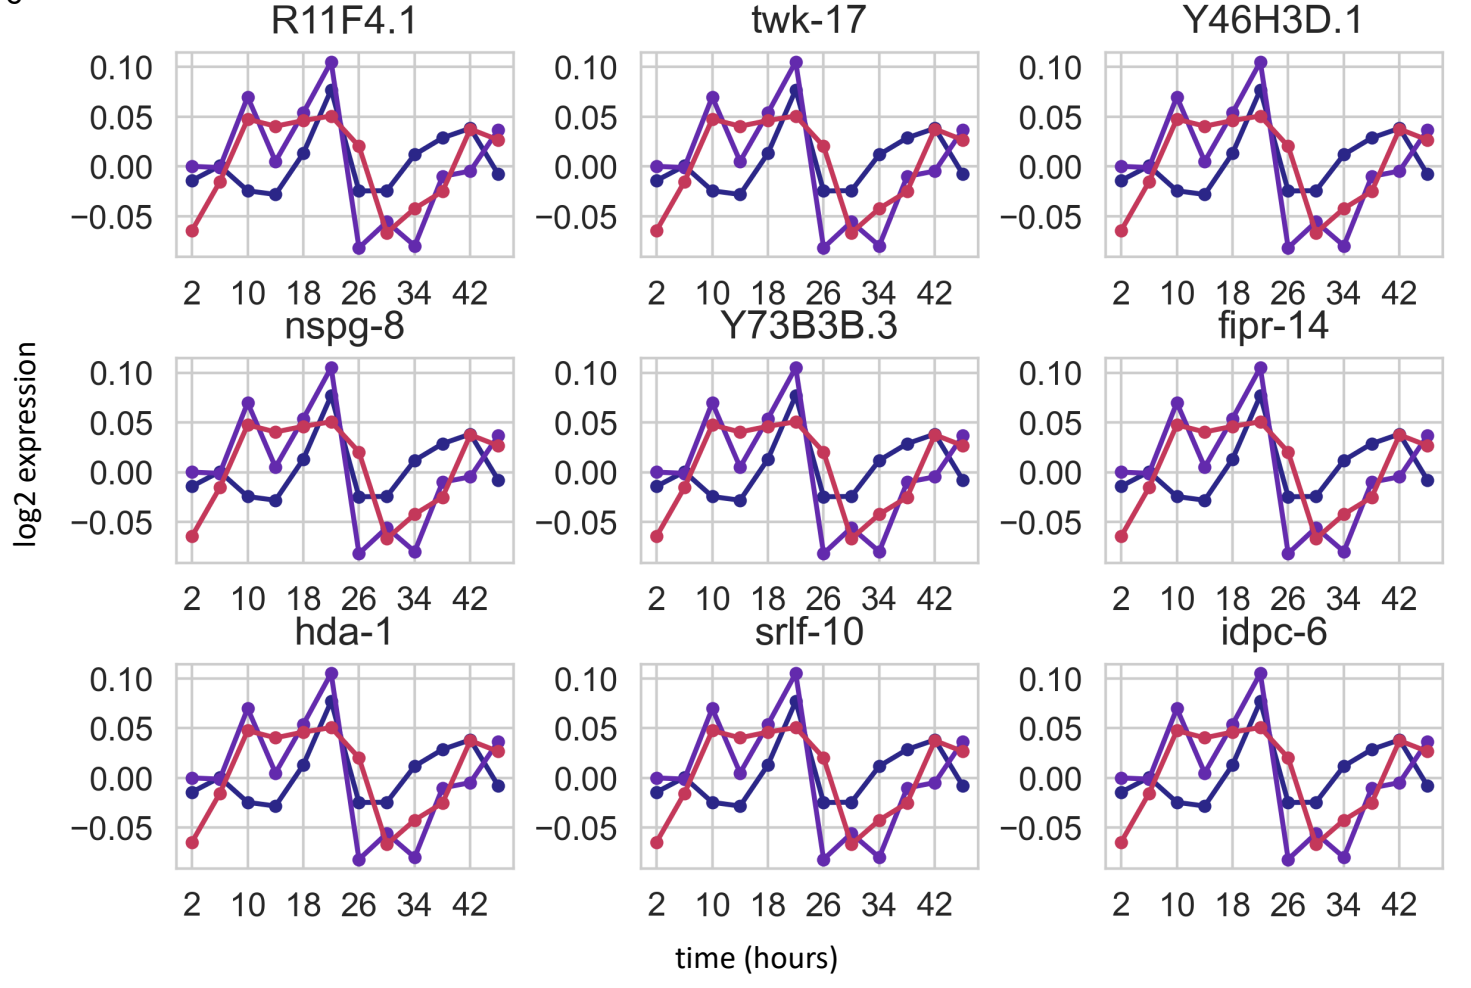

Fig.S3

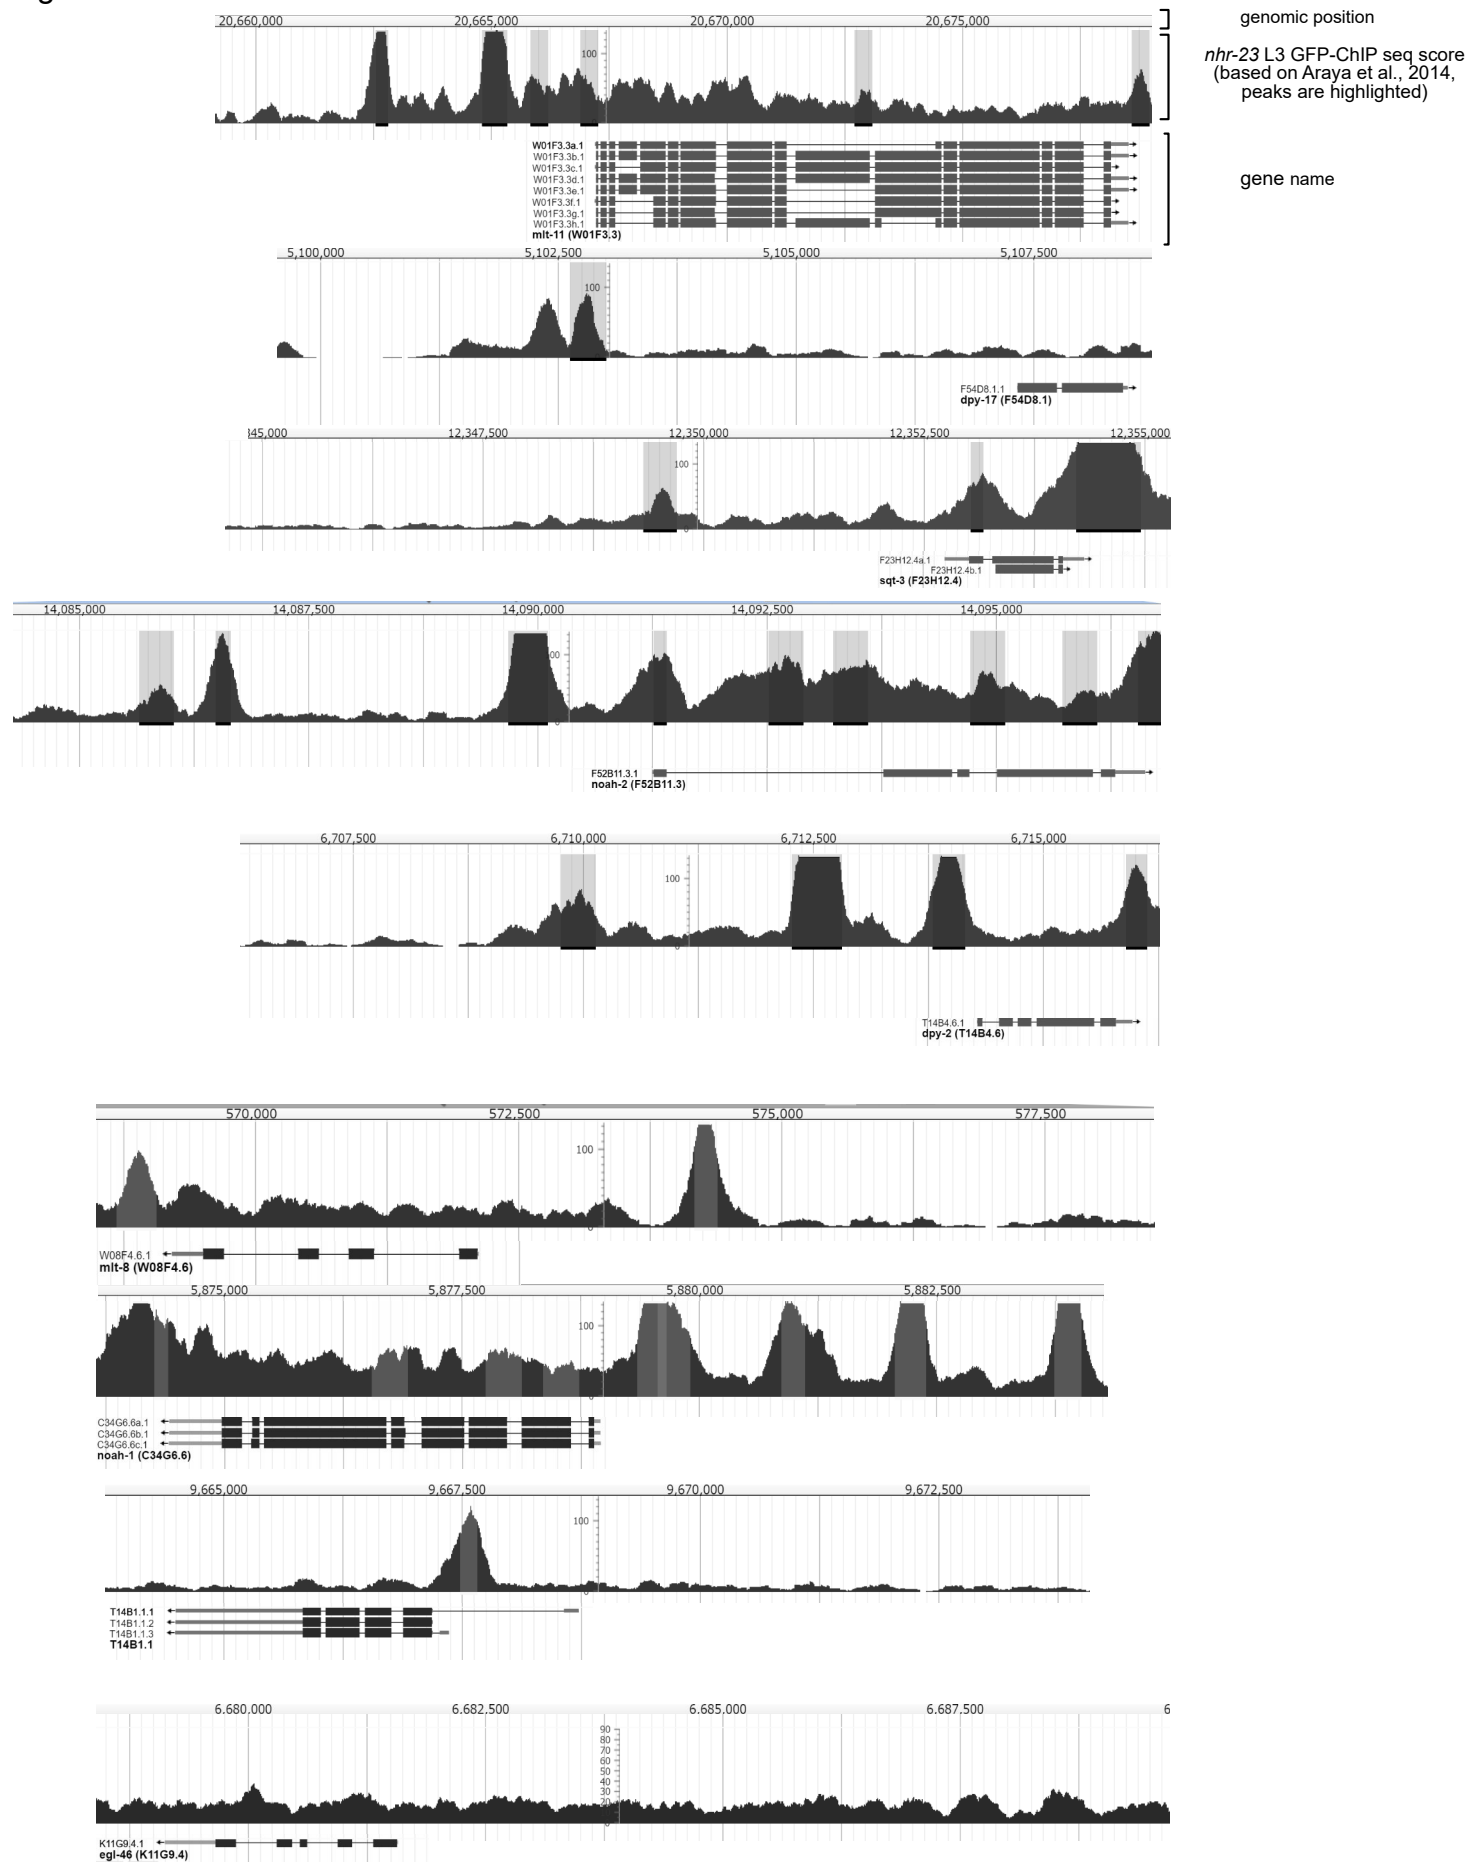

Fig. S4

a

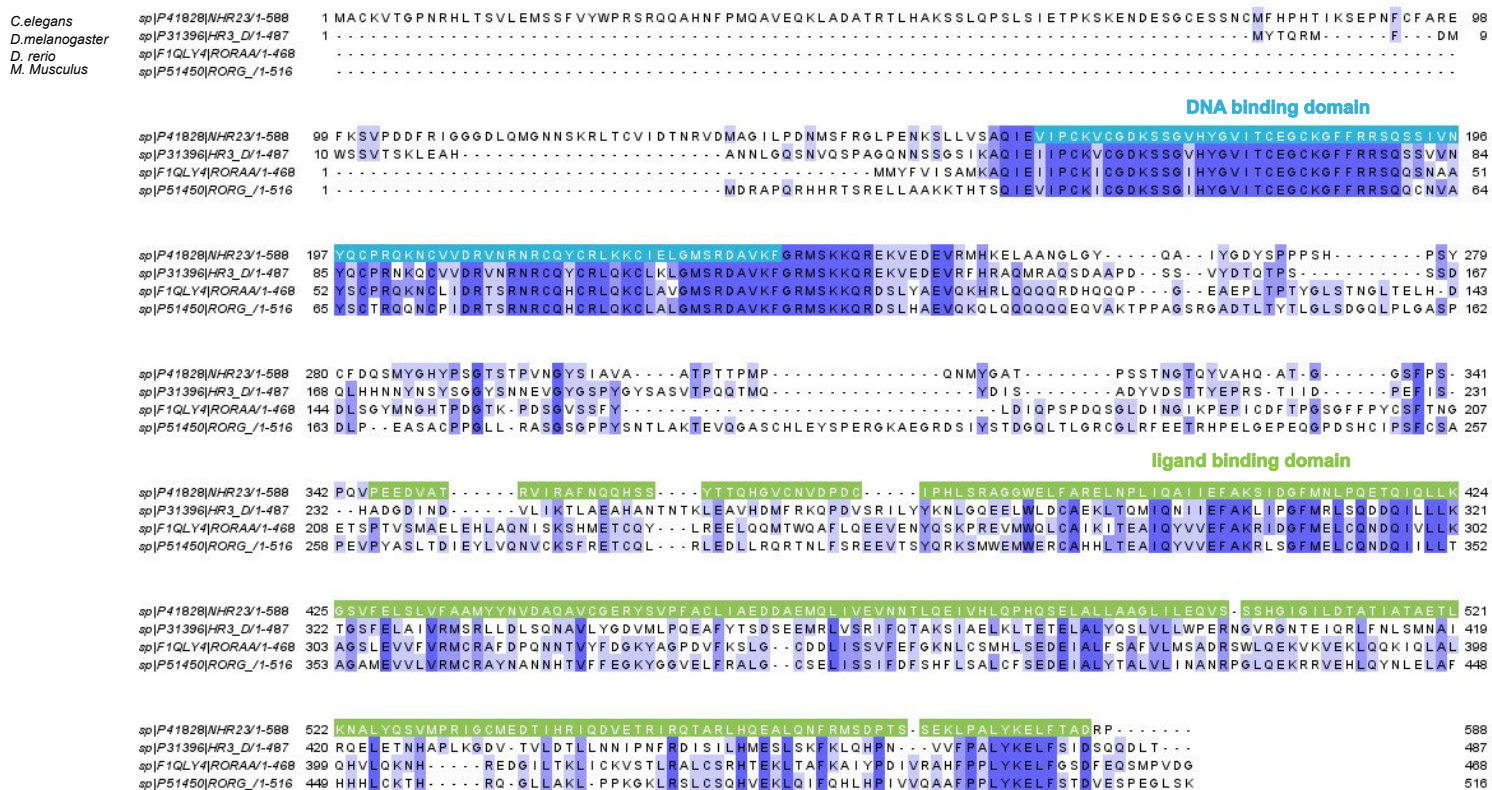

b

|                            | arrhythmic in mice homolog | rhythmic in mice homolog |
|----------------------------|----------------------------|--------------------------|
| arrhythmic in worm homolog | 3057                       | 1178                     |
| rhythmic in worm homolog   | 89                         | 48                       |

For 3d

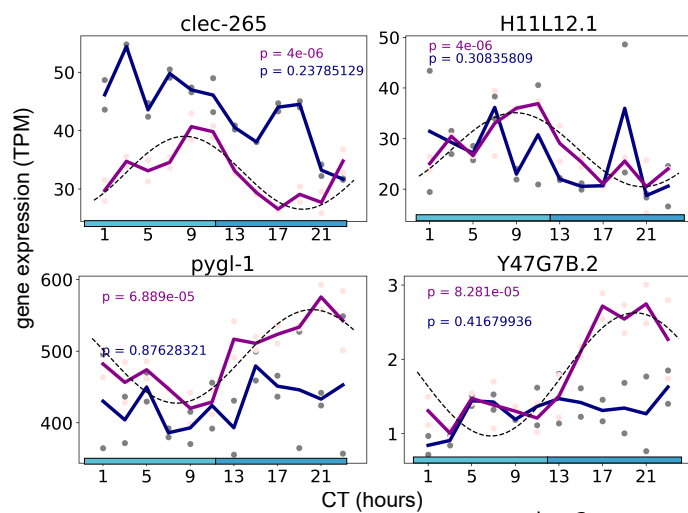

For 3e

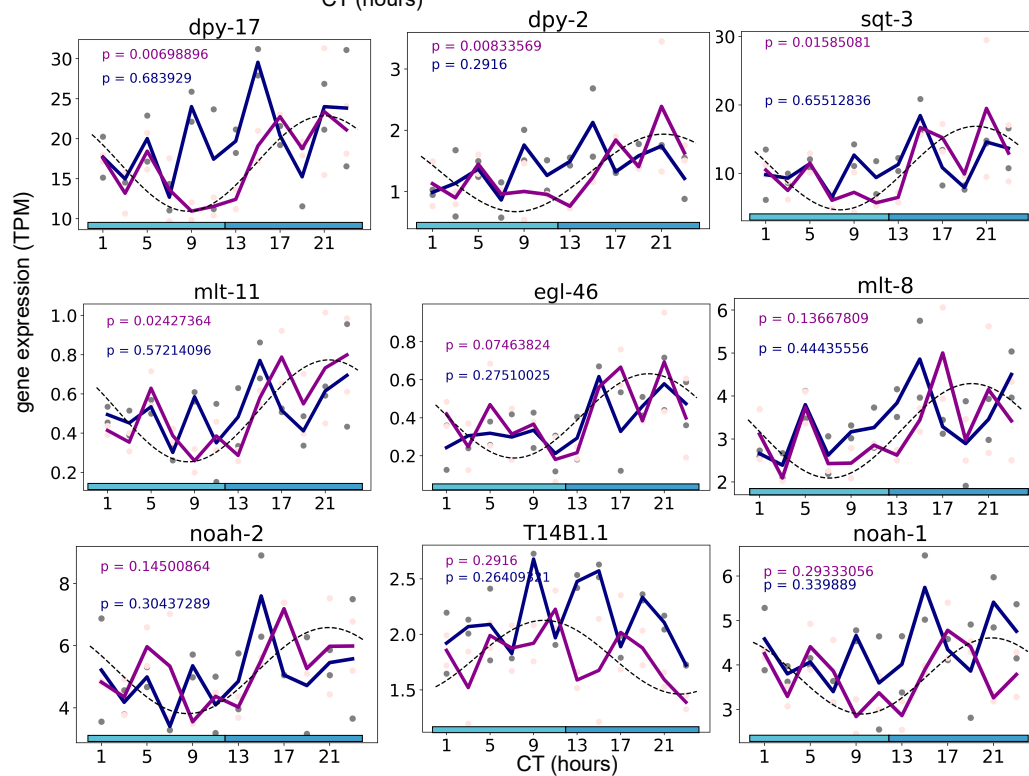

For 3g

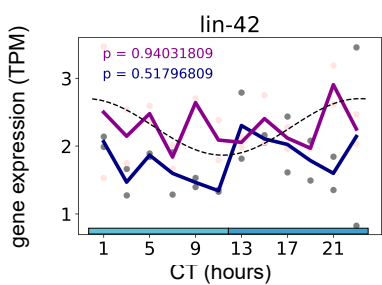

Supplement: 42003_2024_5894_MOESM1_ESM.pdf [file 42003_2024_5894_MOESM1_ESM.pdf]
