# Supplementary material for: Ror homolog nhr-23 is essential for both developmental clock and circadian clock in C. elegans
Source: PubMed Central journal article supplement (PMC10902330; doi:10.1038/s42003-024-05894-3), 2024-02-28
Supplement: 42003_2024_5894_MOESM2_ESM.pdf [file 42003_2024_5894_MOESM2_ESM.pdf]

## **Description of Additional Supplementary Files**

**File name:** Supplemental Data 1

**Description:** Result of BioCycle (and JTK\_CYCLE) analysis of Linden et al., 2010

**File name:** Supplemental Data 2

**Description:** Result of BioCycle analysis of Hendricks et al., 2014

**File name:** Supplemental Data 3

**Description:** Result of BioCycle analysis of our RNA-seq data.

**File name:** Supplemental Data 4

**Description:** Putative artifact in Linden et al., 2010

**File name:** Supplemental Data 5

**Description:** Source data behind the graphs in the manuscript.
